# Supplementary material
Source: PubMed Central journal article supplement (PMC4187807)
Supplement: IAI.02110-14_zii999090822so1.pdf [file IAI.02110-14_zii999090822so1.pdf]

Supplementary Table 1

Table S1.1 Cytokines and chemokines detected from liver supernatants of infected DR4-B6 mice 8 hours post-infection (pg/mL). Each column represents an individual mouse.

| LIVER        | NWM-1   | NWM-2   | NWM-3   | NWM<br>$\Delta$ sea-1 | NWM<br>$\Delta$ sea-2 | NWM<br>$\Delta$ sea-3 |
|--------------|---------|---------|---------|-----------------------|-----------------------|-----------------------|
| Eotaxin      | 195.42  | 175.94  | 149.99  | 165.2                 | 148.26                | 118.68                |
| GCSF         | 330.77  | 93.12   | 137.37  | 58.75                 | 146.13                | 34.94                 |
| GMCSF        | 233.29  | 144.01  | 85.02   | 150.39                | 68.78                 | 58.9                  |
| IFN $\gamma$ | 113.86  | 81.05   | 90.24   | 51.97                 | 59.98                 | 44.89                 |
| IL-1a        | 626.22  | 314.74  | 479.11  | 437.73                | 474.64                | 234.05                |
| IL-1b        | 95.64   | 73.99   | 103.6   | 75.3                  | 76.6                  | 52.3                  |
| IL-2         | 68.7    | 59.37   | 48.38   | 54.91                 | 64.45                 | 51.29                 |
| IL-3         | 43.78   | 15.03   | 15.92   | 25.43                 | 23.96                 | 17.05                 |
| IL-4         | 9.9     | 6.06    | 5.99    | 5.99                  | 3.48                  | 2.91                  |
| IL-5         | 5.93    | 3.4     | 3.61    | 3.23                  | 3.44                  | 2.48                  |
| IL-6         | 100.66  | 75.58   | 80.13   | 46.75                 | 54.3                  | 41.47                 |
| IL-7         | 85.82   | 33.34   | 18.2    | 53.72                 | 35.69                 | 19.08                 |
| IL-9         | 5.03    | 6.12    | 25.67   | 30.33                 | 39.7                  | 36.35                 |
| IL-10        | 140.71  | 80.55   | 59.7    | 75.71                 | 70.92                 | 54.02                 |
| p40          | 90.46   | 90.18   | 69.22   | 62.43                 | 49.43                 | 51.33                 |
| p70          | 170.03  | 110.01  | 86.72   | 121.88                | 98.72                 | 84.64                 |
| IL-13        | 209.34  | 45.08   | 10.62   | 87.96                 | 2.04                  | 0                     |
| IL-15        | 301.09  | 142.13  | 128.15  | 119.2                 | 186.21                | 108.86                |
| IL-17        | 29.11   | 15.98   | 14.03   | 19.94                 | 10.27                 | 9.46                  |
| IP-10        | 3267.3  | 2399.6  | 2761.4  | 2079                  | 2496.26               | 1563.8                |
| KC           | 403.13  | 677.11  | 660.32  | 201.26                | 469.35                | 401.46                |
| LIF          | 1.21    | 0.27    | 1.06    | 2.26                  | 0                     | 0                     |
| LIX          | 0       | 0       | 0       | 0                     | 0                     | 0                     |
| MCP-1        | 1157.86 | 1015.85 | 1077.51 | 818.48                | 783.79                | 509.5                 |
| MCSF         | 73.25   | 34.68   | 39.14   | 40.94                 | 59.52                 | 40.74                 |
| MIG          | 1594.78 | 1236.46 | 1489.09 | 1565.37               | 1701.95               | 826.3                 |
| MIP-1a       | 130.99  | 87.44   | 81.12   | 82.49                 | 82.95                 | 51.18                 |
| MIP-1b       | 265.04  | 151.8   | 101.87  | 167.5                 | 35.94                 | 45.12                 |
| MIP-2        | 356.66  | 366.65  | 427.87  | 132.54                | 184.15                | 116.86                |
| RANTES       | 84.76   | 52.71   | 49.35   | 60.08                 | 52.66                 | 35.2                  |
| TNF-a        | 35.63   | 25.68   | 27.5    | 23.21                 | 16.55                 | 16.89                 |
| VEGF         | 7.06    | 3.5     | 2.84    | 5.26                  | 5.31                  | 1.94                  |

Table S1.2 Cytokines and chemokines detected from sera of infected DR4-B6 mice 8 hours post-infection (pg/mL). Each column represents an individual mouse. ND = not detectable

| SERUM        | NWM-1   | NWM-2   | NWM-3   | NWM-4   | NWM<br>$\Delta$ sea-1 | NWM<br>$\Delta$ sea-2 | NWM<br>$\Delta$ sea-3 |
|--------------|---------|---------|---------|---------|-----------------------|-----------------------|-----------------------|
| Eotaxin      | 1413.98 | 1067.95 | 1300.86 | 1169.51 | 1316.71               | 1855.2                | 1306.32               |
| GCSF         | 3270.89 | 2627.33 | 2510.03 | 1365.86 | 1653.55               | 6473.47               | 5019.4                |
| GMCSF        | 60.73   | 0       | 78.25   | 98.57   | 0                     | 34.46                 | 49.49                 |
| IFN $\gamma$ | 59.66   | 43.69   | 68.64   | 21.32   | 0                     | 0                     | 0                     |
| IL-1a        | 96.99   | 64.89   | 34.29   | 0       | 44.14                 | 75.65                 | 44.14                 |
| IL-1b        | 0.39    | 39.36   | 48.38   | 3.39    | 18.3                  | 6.4                   | 21.17                 |
| IL-2         | 22.94   | 9.52    | 7.16    | 0       | 3.44                  | 0.56                  | 4.17                  |
| IL-3         | 5.73    | 0       | 0       | 0       | 0                     | 0                     | 0                     |
| IL-4         | 0.31    | 0       | 0       | 0.8     | 0.16                  | 0                     | 0                     |
| IL-5         | 57.27   | 29.19   | 16.56   | 29.48   | 16.14                 | 55.79                 | 49.27                 |
| IL-6         | 495.84  | 270.9   | 193.13  | 244.44  | 315.99                | 488.26                | 490.49                |
| IL-7         | 0       | 0       | 0       | 0       | 0.84                  | 0                     | 0                     |
| IL-9         |         | 35.04   | 33.52   | 423.14  | 0                     | ND                    | 113.4                 |
| IL-10        | 5.33    | 25.95   | 0       | 1.28    | 38.41                 | 17.56                 | 43.59                 |
| p40          | 0       | 0       | 44.71   | 38.58   | 6.4                   | 0                     | 34.25                 |
| p70          | 53.88   | 79.12   | 83.27   | 83.27   | 28.9                  | 13.65                 | 21.08                 |
| IL-13        | 155.34  | 83.04   | 215.99  | 102.08  | 83.04                 | 215.99                | 136.24                |
| IL-15        | 0       | 0       | 0       | 0       | 0                     | 0                     | 6.4                   |
| IL-17        | 0       | 0       | 0       | 0       | 0                     | 0                     | 1.79                  |
| IP-10        | 979.71  | 1346.43 | 2032.9  | 1277.95 | 408.14                | 212.34                | 626.06                |
| KC           | 5460.82 | 4864.12 | 3346.85 | 4486.14 | 3188.64               | 7825.15               | 3553.02               |
| LIF          | 0       | 0       | 0       | 0       | 0                     | 0                     | 0                     |
| LIX          | 9051.91 | 2767.26 | 4635.6  | 673.01  | 3979.11               | 2518.47               | 7071.74               |
| MCP-1        | 1816.63 | 3515.82 | 4216.75 | 2883.08 | 1336.44               | 2853.34               | 3527.23               |
| MCSF         | 2.72    | 4.22    | 4.74    | 1.76    | 5                     | 4.74                  | 3.46                  |
| MIG          | 103.68  | 152.84  | 170.77  | 109.46  | 52.5                  | 293.42                | 77.16                 |
| MIP-1a       | 148.89  | 71.53   | 124.46  | 159.59  | 127.58                | 114.73                | 188.86                |
| MIP-1b       | 171.05  | 188.02  | 237.79  | 211.43  | 66.05                 | 163.77                | 272.49                |
| MIP-2        | 0       | 50.19   | 56.23   | 0       | 32                    | 80.25                 | 74.28                 |
| RANTES       | 48.17   | 45.13   | 86.01   | 10.28   | 32.02                 | 51.13                 | 39.88                 |
| TNF-a        | 19.51   | 23.1    | 17.43   | 13.93   | 13.93                 | 12.07                 | 22.32                 |
| VEGF         | 0.04    | 0.46    | 0.48    | 0.25    | 0.25                  | 0.29                  | 0.34                  |
